# Supplementary material for: Prevalence of Diabetes Medication Intensifications in Older Adults Discharged From US Veterans Health Administration Hospitals
Source: PubMed Central journal article supplement (PMC7093767; doi:10.1001/jamanetworkopen.2020.1511), 2020-03-24
Supplement: jamanetwopen-3-e201511-s001.pdf [file jamanetwopen-3-e201511-s001.pdf]

## Supplementary Online Content

Anderson TS, Lee S, Jing B, et al. Prevalence of diabetes medication intensifications in older adults discharged from US Veterans Health Administration hospitals. *JAMA Netw Open*. 2020;3(3):e201511. doi:10.1001/jamanetworkopen.2020.1511

**eFigure.** Cohort Construction Flowchart

**eTable 1.** Likelihood of Cohort Patients to Benefit From Stricter Glycemic Control

**eTable 2.** Rates of Diabetes Medication Intensification in Older Adults Following Hospitalization, by Inpatient and Outpatient Blood Glucose Control

**eTable 3.** Predictors of Diabetes Medication Intensification in Older Adults Following Hospitalization

This supplementary material has been provided by the authors to give readers additional information about their work.

**eFigure:** Cohort construction flowchart

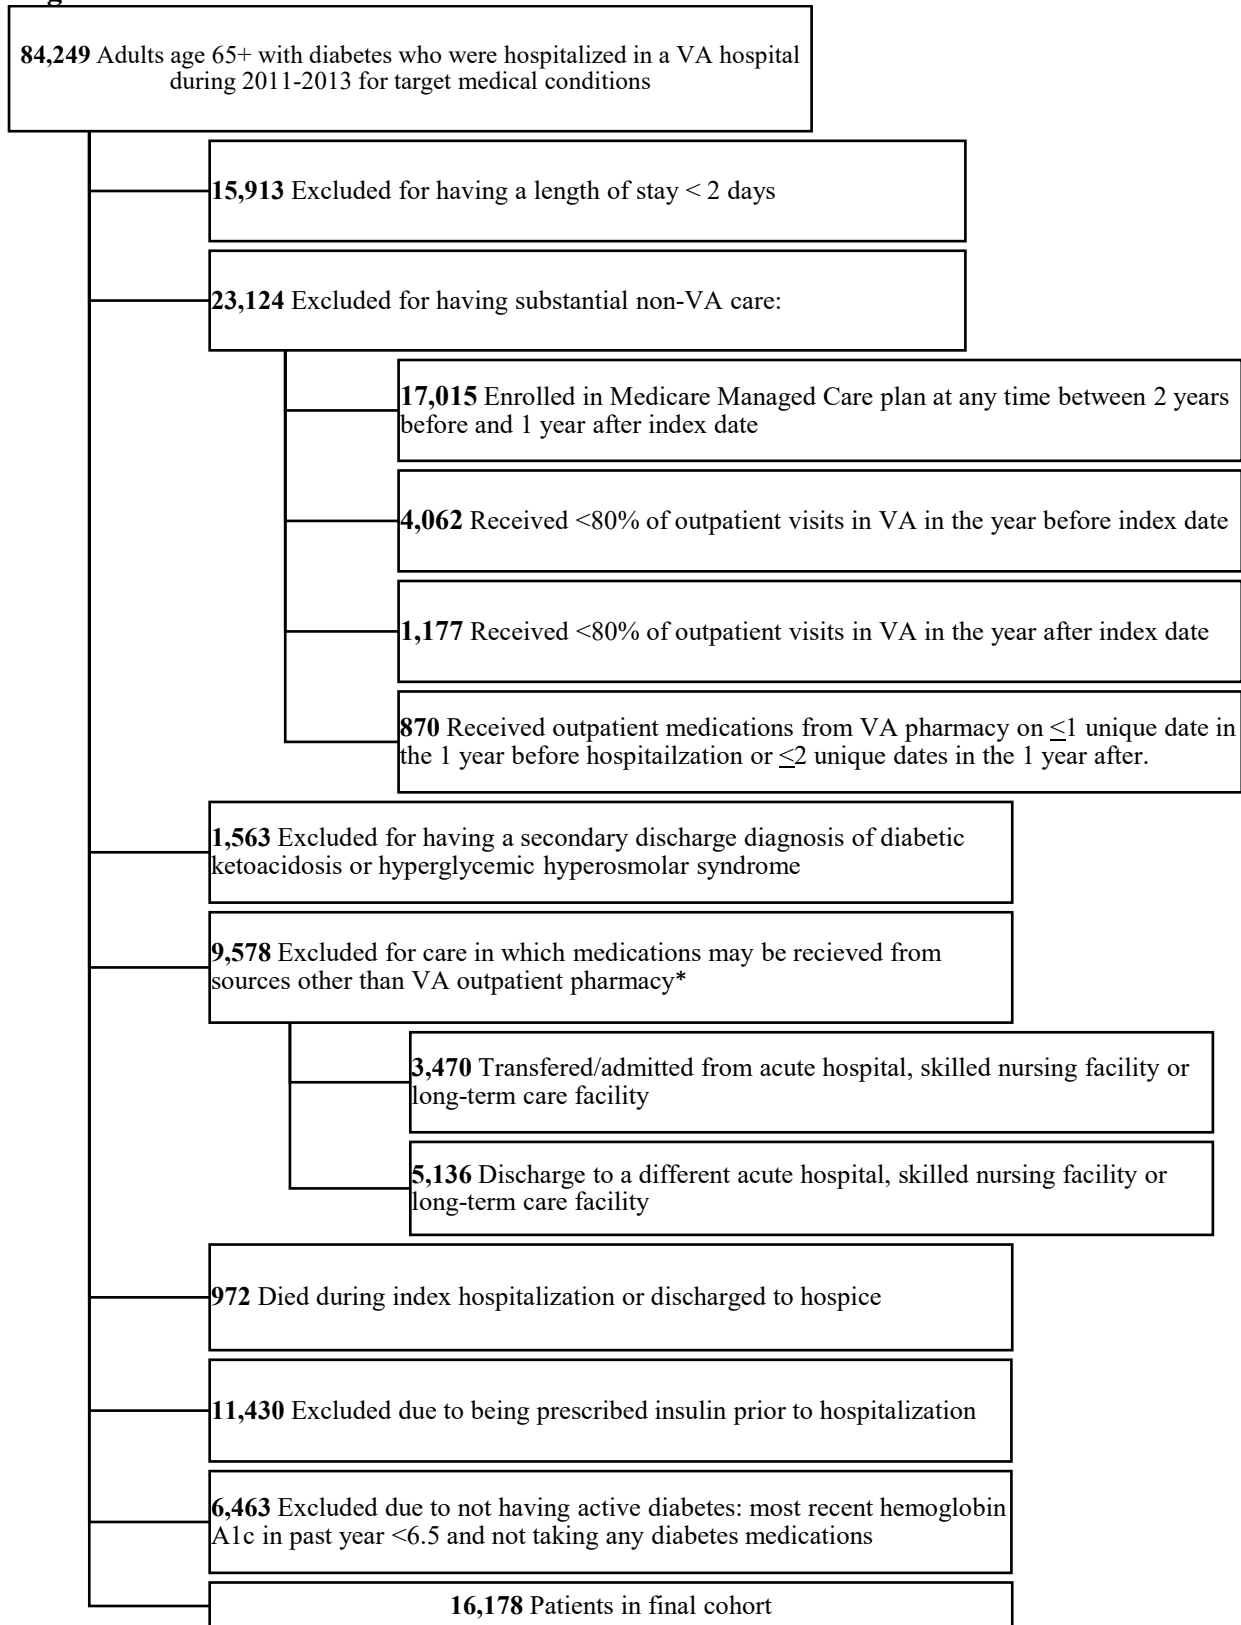

**eTable 1.** Likelihood of cohort patients to benefit from stricter glycemic control

| Life expectancy | Preadmission hemoglobin A1c control |              |       |                            |
|-----------------|-------------------------------------|--------------|-------|----------------------------|
|                 | <7.5%                               | 7.5% to 8.9% | >9.0% | Not measured in prior year |
| >10 years       | 4,984                               | 1,415        | 511   | 155                        |
| 5 to 10 years   | 3,337                               | 878          | 309   | 128                        |
| <5 years        | 3,169                               | 951          | 224   | 117                        |

**Note:** Likelihood of benefit from diabetes medication intensification defined by preadmission hemoglobin A1c and estimated life expectancy and color coded as follows:

Orange boxes – Unlikely to benefit from stricter glycemic control

Grey boxes – indeterminate likelihood of benefit

Blue boxes – likely to benefit stricter glycemic control

**eTable 2.** Rates of diabetes medication intensification in older adults following hospitalization, by inpatient and outpatient blood glucose control

|                                          | Intensification, No. (%) | Odds Ratio (95% CI) |                      |
|------------------------------------------|--------------------------|---------------------|----------------------|
|                                          |                          | Unadjusted          | Adjusted             |
| Overall cohort (n=16,178)                | 1,626 (10.5)             |                     |                      |
| Preadmission hemoglobin A1c <sup>a</sup> |                          |                     |                      |
| Tightly-controlled: <7.0% (n=8,535)      | 486 (5.7)                | 1 [Reference]       | 1 [Reference]        |
| Controlled: 7.0 to 8.9% (n=6,199)        | 777 (12.5)               | 2.39 (2.12 to 2.70) | 2.46 (2.03 to 2.98)  |
| Elevated: ≥9.0% (n=1,044)                | 329 (31.5)               | 7.79 (6.63 to 9.16) | 7.06 (5.01 to 9.94)  |
| Not measured (n=400)                     | 34 (8.5)                 | 1.55 (1.07 to 2.23) | 1.37 (0.69 to 2.72)  |
| Inpatient blood glucose <sup>b</sup>     |                          |                     |                      |
| Not elevated (n=8,407)                   | 549 (5.8)                | 1 [Reference]       | 1 [Reference]        |
| Moderately elevated (n=4,724)            | 596 (11.9)               | 2.48 (2.18 to 2.83) | 2.74 (2.20 to 3.42)  |
| Severe elevated (n=1,620)                | 481 (28.4)               | 7.78 (6.69 to 9.06) | 9.46 (7.11 to 12.59) |

Note: Adjusted odds ratios estimated using mixed effect logistic regression accounting for age, gender, race, income, Charlson comorbidities, length of stay, primary discharge diagnosis, year, hospital training status, receipt of steroids during hospitalization, preadmission HbA1c, inpatient blood glucose, an interaction term for preadmission HbA1c and inpatient blood glucose, and random effects to account for clustering by VA hospital.

<sup>a</sup> Preadmission hemoglobin A1c measured using most recent hemoglobin A1c laboratory value collected within 1 year preceding hospitalization and defined as: *tightly-controlled* if HbA1c <7.0%, *controlled* if HbA1c 7.0% to 8.9%, or *elevated* if HbA1c ≥9.0%, or not measured if no HbA1c laboratory was available in the year preceding hospitalization.

<sup>b</sup> Inpatient blood glucose control defined by number of elevated blood glucose recordings and defined as: *severely elevated* if ≥3 blood glucose recordings of ≥300 mg/dL; *moderately elevated* if ≥3 blood glucose recordings of ≥200 mg/dL without meeting criteria for *severely elevated*, or *not elevated*. For patients with missing or fewer than 3 blood glucose recordings, multiple imputation was conducted.

**eTable 3.** Predictors of diabetes medication intensification in older adults following hospitalization

| Characteristic                             | Not intensified (N=14552) | Intensified (N=1626) | Adjusted OR (95% CI) |
|--------------------------------------------|---------------------------|----------------------|----------------------|
| <b>Demographics and comorbidities</b>      |                           |                      |                      |
| Age                                        |                           |                      |                      |
| 65-74                                      | 7,932                     | 987                  | 1 [Reference]        |
| 75-84                                      | 4,608                     | 475                  | 0.88 (0.77 to 0.98)  |
| ≥85                                        | 2,012                     | 164                  | 0.65 (0.53 to 0.78)  |
| Female                                     | 251                       | 32                   | 0.98 (0.65 to 1.47)  |
| Race/ethnicity                             |                           |                      |                      |
| White                                      | 11,859                    | 1,279                | 1 [Reference]        |
| Black                                      | 2,061                     | 275                  | 1.12 (0.95 to 1.32)  |
| Hispanic                                   | 210                       | 15                   | 0.81 (0.46 to 1.43)  |
| Other                                      | 422                       | 57                   | 1.12 (0.82 to 1.52)  |
| Income                                     | 26668 (467998)            | 26517 (44822)        | 1.00 (1.00 to 1.00)  |
| <b>Hospitalization characteristics</b>     |                           |                      |                      |
| Year                                       |                           |                      |                      |
| 2011                                       | 5,705                     | 665                  | 1 [Reference]        |
| 2012                                       | 4,613                     | 488                  | 0.90 (0.78 to 1.03)  |
| 2013                                       | 4,234                     | 473                  | 0.91 (0.79 to 1.04)  |
| Teaching hospital                          | 13,089                    | 1,462                | 0.78 (0.57 to 1.06)  |
| Length of stay, days                       |                           |                      |                      |
| 2                                          | 3,945                     | 323                  | 1 [Reference]        |
| 3-4                                        | 5,041                     | 489                  | 1.08 (0.93 to 1.24)  |
| 5-7                                        | 3,265                     | 409                  | 1.20 (1.01 to 1.43)  |
| 8-13                                       | 1,645                     | 268                  | 1.31 (1.10 to 1.56)  |
| ≥14                                        | 656                       | 137                  | 1.41 (1.12 to 1.78)  |
| <b>Preadmission laboratories</b>           |                           |                      |                      |
| Hemoglobin A1c                             |                           |                      |                      |
| Tightly-controlled: <7.0%                  | 8,049                     | 486                  | 1 [Reference]        |
| Controlled: 7.0 to 8.9%                    | 5,422                     | 777                  | 2.46 (2.03 to 2.98)  |
| Elevated: ≥9.0%                            | 715                       | 329                  | 7.06 (5.01 to 9.94)  |
| Not measured                               | 366                       | 34                   | 1.37 (0.69 to 2.72)  |
| eGFR, ml/min/1.73 m <sup>2</sup>           |                           |                      |                      |
| >90                                        | 1,977                     | 180                  | 1 [Reference]        |
| 60-89                                      | 5,671                     | 583                  | 1.06 (0.86 to 1.30)  |
| 45-59                                      | 2,884                     | 353                  | 1.24 (0.96 to 1.60)  |
| 30-44                                      | 1,584                     | 178                  | 1.06 (0.74 to 1.52)  |
| 15-30                                      | 490                       | 63                   | 0.96 (0.69 to 1.34)  |
| <15                                        | 209                       | 28                   | 1.21 (0.61 to 2.40)  |
| <b>Inpatient laboratories</b>              |                           |                      |                      |
| Inpatient blood glucose                    |                           |                      |                      |
| Not elevated                               | 7,920                     | 487                  | 1 [Reference]        |
| Moderately elevated                        | 4,163                     | 561                  | 2.74 (2.20 to 3.42)  |
| Severe elevated                            | 1,163                     | 457                  | 9.46 (7.11 to 12.59) |
| Discharge eGFR, ml/min/1.73 m <sup>2</sup> |                           |                      |                      |
| >90                                        | 2,541                     | 238                  | 1 [Reference]        |
| 60-89                                      | 5,509                     | 564                  | 1.07 (0.89 to 1.29)  |
| 45-59                                      | 2,671                     | 347                  | 1.25 (0.98 to 1.59)  |
| 30-44                                      | 1,417                     | 191                  | 1.29 (0.91 to 1.84)  |
| 15-30                                      | 508                       | 78                   | 1.33 (0.99 to 1.80)  |

|                                          |           |           |                      |
|------------------------------------------|-----------|-----------|----------------------|
| <15                                      | 232       | 34        | 1.28 (0.69 to 2.36)  |
| <b>Medication use</b>                    |           |           |                      |
| Admission medication count               | 9.2 (4.9) | 7.9 (4.7) | 0.99 (0.98 to 1.00)  |
| No. admission diabetes medications       |           |           |                      |
| 0                                        | 3,505     | 648       | 1.84 (1.58 to 2.15)  |
| 1                                        | 7,635     | 628       | 1 [Reference]        |
| 2                                        | 3,056     | 294       | 0.76 (0.62 to 0.93)  |
| 3                                        | 338       | 52        | 0.78 (0.49 to 1.26)  |
| >4                                       | 18        | 4         | 2.76 (0.67 to 11.37) |
| Prior diabetes medication adherence      |           |           |                      |
| Proportion of days covered <80%          | 3,354     | 346       | 1.07 (0.89 to 1.29)  |
| Proportion of days covered ≥80%          | 7,693     | 632       | Reference            |
| Any receipt of inpatient corticosteroids | 1,551     | 259       | 1.24 (1.04 to 1.49)  |
| <b>Comorbidities</b>                     |           |           |                      |
| Congestive heart failure                 | 6,054     | 718       | 0.94 (0.82 to 1.08)  |
| Renal disease                            | 4,513     | 548       | 0.85 (0.73 to 0.99)  |
| Cerebrovascular accident                 | 3,784     | 433       | 1.05 (0.91 to 1.21)  |
| Prior myocardial infarction              | 2,871     | 333       | 0.93 (0.79 to 1.09)  |
| Malignancy                               | 3,249     | 325       | 0.99 (0.86 to 1.14)  |
| Dementia                                 | 472       | 47        | 0.86 (0.61 to 1.20)  |
| <b>Admission diagnoses</b>               |           |           |                      |
| Pneumonia                                | 1,721     | 172       | 1 [Reference]        |
| Arrhythmia                               | 206       | 11        | 0.69 (0.36 to 1.34)  |
| Asthma                                   | 72        | 12        | 1.28 (0.64 to 2.52)  |
| Chronic obstructive pulmonary disease    | 1,344     | 187       | 1.12 (0.87 to 1.43)  |
| Chest pain                               | 618       | 46        | 1.00 (0.69 to 1.45)  |
| Conduction disorders                     | 1,491     | 126       | 1.11 (0.86 to 1.45)  |
| Coronary artery disease                  | 1,602     | 193       | 1.35 (1.06 to 1.73)  |
| Acute myocardial infarction              | 861       | 110       | 1.35 (0.99 to 1.84)  |
| Heart failure                            | 2,258     | 295       | 1.46 (1.15 to 1.84)  |
| Heart valve disorders                    | 281       | 31        | 1.35 (0.87 to 2.08)  |
| Sepsis                                   | 259       | 26        | 1.06 (0.66 to 1.70)  |
| Skin infection                           | 1,245     | 132       | 1.01 (0.77 to 1.31)  |
| Stroke                                   | 701       | 90        | 1.16 (0.84 to 1.60)  |
| Transient ischemic attack                | 243       | 20        | 1.04 (0.61 to 1.76)  |
| Urinary tract infection                  | 1,298     | 131       | 1.08 (0.83 to 1.41)  |
| Venous thromboembolism                   | 352       | 44        | 1.25 (0.85 to 1.83)  |
